# Supplementary material
Source: publisher figshare collection journal article supplement (https://rs.figshare.com/ndownloader/files/15369656)
Supplement: Supplementary file 1 [file 15369656]

PART_ID_NUM	AGE	TRIAL_LABOR_PLANNED	GESTATIONAL_AGE	WEEKS_GESTATION	DAYS_GESTATION	GESTATIONAL_AGE_DETERMINED	SINGLETON	VERTEX_PRESENTATION	BIRTHS_ALIVE	BIRTHS_DEAD	BIRTHS_TOTAL	DELIVER_METHOD_CHILD_1	DELIVER_METHOD_CHILD_2	DELIVER_METHOD_CHILD_3	DELIVER_METHOD_CHILD_4	PREVIOUS_CPD_CSECTION	HOURS_IN_LABOR_FOR_CPD	EXPERIMENTAL_GROUP	HEIGHT	WEIGHT	BLOOD_PRESSURE_SYSTOLIC	BLOOD_PRESSURE_DIASTOLIC	HEAD_CIRCUMFERENCE	BISACROMIAL_DIAMETER	SHOULDER_HEIGHT	WAIST_CIRCUMFERENCE	WAIST_HEIGHT	INTERTHOCHANTERIC_DIAMETER	INTERTHOCHANTERIC_HEIGHT	FOOT_LENGTH	PERINATAL_MORTALITY	CAUSE_OF_DEATH_BABY	MATERNAL_MORTALITY	CAUSE_OF_DEATH_MOTHER	BIRTHDATE_YEAR	BIRTHDATE_MONTH	BIRTHDATE_DAY	DELIVERY_METHOD	WAS_LABOR_TRIED	C_SECTION_REASON	C_SECTION_AFTER_TRIAL_REASON	HOURS_LABOR_BEFORE_CSECTION	BIRTH_WEIGHT	BIRTH_LENGTH	BIRTH_HEAD_CIRCUMFERENCE	BABY_GENDER	APGAR_SCORE_1MIN	APGAR_SCORE_5MIN	OTHER_COMPLICATIONS
5	23	1	385	38	5	2	1	1	0	0	0	NaN	NaN	NaN	NaN	NaN	NaN	3	167	59	100	70	52	44.5	132	93	94	92	85	23.9	2	NaN	2	NaN	2008	8	16	1	1	NaN	0	NaN	3.1	50	35.5	1	8	9	2
8	28	1	380	38	0	2	1	1	1	0	1	1	NaN	NaN	NaN	NaN	NaN	2	148	48	110	80	55.5	45.5	121.7	93.6	88.5	93.5	78.1	22.1	2	NaN	2	NaN	2008	8	16	1	1	NaN	0	NaN	2.9	49	30	1	8	9	2
10	29	1	413	41	3	2	1	1	1	0	1	1	NaN	NaN	NaN	NaN	NaN	2	163.5	61.5	100	70	58	42.2	132.1	100	97.6	97.5	90.8	24.3	2	NaN	2	NaN	2008	8	6	1	1	NaN	0	NaN	3.5	54	34	2	8	9	2
11	32	1	374	37	4	1	1	1	1	0	1	1	NaN	NaN	NaN	NaN	NaN	2	159.2	63	110	70	58.9	39.2	130.5	95.6	97.5	97.5	93.2	24.4	2	NaN	2	NaN	2008	8	28	1	1	NaN	0	NaN	2.9	NaN	NaN	1	8	9	2
12	21	1	413	41	3	1	1	1	0	0	0	NaN	NaN	NaN	NaN	NaN	NaN	3	155	67	120	80	58	40	127.1	98.2	92.1	101	84	24.6	2	NaN	2	NaN	2008	8	4	1	1	NaN	0	NaN	2.9	NaN	NaN	2	NaN	NaN	2
13	39	1	383	38	3	2	1	1	2	0	2	1	1	NaN	NaN	NaN	NaN	2	165.5	65	110	70	59.5	41.4	132.5	107.1	95.2	102.6	82.1	23.4	2	NaN	2	NaN	2008	8	12	1	1	NaN	0	NaN	2.8	49	34	1	8	9	2
14	27	1	384	38	4	1	1	1	0	0	0	NaN	NaN	NaN	NaN	NaN	NaN	3	149	61	90	60	57.3	38.1	121.2	102.8	90.5	100.2	77.5	22.5	2	NaN	2	NaN	2008	9	22	1	1	NaN	0	NaN	3.4	52.5	35.7	1	8	9	2
15	26	1	373	37	3	1	1	1	0	0	0	NaN	NaN	NaN	NaN	NaN	NaN	3	152	75	NaN	NaN	57.3	39	125	113.2	87.6	101.5	82.3	24.6	2	NaN	2	NaN	2008	8	28	2	1	1	0	17	3.8	58.8	37.8	1	8	9	2
16	22	1	426	42	6	1	1	1	0	0	0	NaN	NaN	NaN	NaN	NaN	NaN	3	152	52	110	70	53.5	35.2	123.7	93.5	94	89.3	82	23.6	2	NaN	2	NaN	2008	8	7	2	1	3	0	12	3.5	51	34	1	6	8	1
17	29	1	393	39	3	1	1	1	1	1	1	1	NaN	NaN	NaN	NaN	NaN	2	159	70	100	80	59.9	45.2	132	108.5	93.5	104.5	89.1	26.2	2	NaN	2	NaN	2008	8	15	1	1	NaN	0	NaN	3.3	NaN	NaN	1	8	9	1
19	25	1	401	40	1	2	1	1	1	0	1	1	NaN	NaN	NaN	NaN	NaN	2	161.5	61.5	120	80	53.6	36.5	135.6	87.4	94.6	93.6	82.2	24.8	2	NaN	2	NaN	2008	8	7	1	1	NaN	0	NaN	3.5	54	36	2	7	8	2
20	37	1	396	39	6	2	1	1	2	0	2	1	1	NaN	NaN	NaN	NaN	2	164.8	79	100	70	58.3	39.2	138.2	106.1	100.5	106.8	89.5	26	2	NaN	2	NaN	2008	8	14	1	1	NaN	0	NaN	3.3	47	36.5	1	8	9	2
21	28	1	431	43	1	1	1	NaN	1	0	1	1	NaN	NaN	NaN	NaN	NaN	2	145.9	60	100	70	54.5	37.4	121.1	96.6	50	91.1	75.9	22.5	2	NaN	2	NaN	2008	8	16	2	1	3	0	8	3.3	51	35	1	7	8	2
22	23	1	392	39	2	2	1	1	0	0	0	NaN	NaN	NaN	NaN	NaN	NaN	3	153.2	50	90	60	52.5	35.7	134.5	90.5	89.3	87.2	81.1	22.2	2	NaN	2	NaN	2008	8	7	1	1	NaN	0	NaN	3.1	50	35.5	2	8	9	2
23	19	1	375	37	5	1	1	1	0	0	0	NaN	NaN	NaN	NaN	NaN	NaN	3	162.5	60.5	110	70	55.7	36.6	134	95.4	96.6	98	89.1	22.1	2	NaN	2	NaN	2008	8	23	1	1	NaN	0	NaN	3.2	NaN	NaN	1	8	9	2
26	29	1	396	39	6	2	1	1	1	0	1	1	NaN	NaN	NaN	NaN	NaN	2	146.5	51	120	70	57.3	39	123	97.6	88	87.9	81.5	22.5	2	NaN	2	NaN	2008	8	17	1	1	NaN	0	NaN	3.2	NaN	NaN	2	8	9	2
27	24	1	406	40	6	2	1	1	0	0	0	NaN	NaN	NaN	NaN	NaN	NaN	3	158	61	130	90	51.6	37.3	132.5	93.8	93.8	98.6	81.3	23.2	2	NaN	2	NaN	2008	8	21	2	1	3	0	NaN	3.8	54.5	36.5	1	7	9	2
28	27	2	375	37	5	2	1	1	1	0	1	2	NaN	NaN	NaN	1	24	1	148.5	71	120	90	56.8	37	125.7	111.5	90.6	103.6	82.3	22.5	2	NaN	2	NaN	2008	9	2	2	3	6	0	0	3	51.1	34.2	1	8	9	2
29	23	1	373	37	3	2	1	NaN	0	0	0	NaN	NaN	NaN	NaN	NaN	NaN	3	159.8	67	100	70	57.9	39.7	132.5	97.4	102.5	98.7	95.3	24.9	2	NaN	2	NaN	2008	9	15	1	1	NaN	0	NaN	3.6	50.1	35.7	2	8	9	2
30	28	1	373	37	3	2	1	1	0	0	0	NaN	NaN	NaN	NaN	NaN	NaN	3	155	65	120	80	56.8	31.2	128.4	99.5	91.5	101.9	82.4	23.4	2	NaN	2	NaN	2008	9	1	1	1	NaN	0	NaN	3.4	49.5	34.5	2	8	9	1
31	31	1	372	37	2	1	1	1	1	0	1	2	NaN	NaN	NaN	1	6	1	145.4	47	120	80	57.4	37.2	120.4	93.5	99.2	84.2	83.4	21.9	2	NaN	2	NaN	2008	9	18	2	1	6	0	NaN	2.5	50.5	35.5	2	6	8	2
32	29	1	390	39	0	2	1	1	1	0	1	2	NaN	NaN	NaN	1	8	1	157.7	78.5	130	90	57.8	39.2	132.5	111.5	100.5	107.3	88.7	23.1	2	NaN	2	NaN	2008	8	21	2	3	1	0	NaN	3.5	59.1	37.5	2	8	9	1
33	29	1	372	37	2	2	1	1	1	0	1	2	NaN	NaN	NaN	1	12	1	156.8	50.5	90	60	57.9	35	131.9	86.8	100.5	88.6	70.5	22.8	2	NaN	2	NaN	2008	9	2	2	1	1	0	NaN	2.6	51.2	34.4	1	8	9	2
34	29	1	391	39	1	2	1	1	2	0	2	1	1	NaN	NaN	NaN	NaN	2	166.1	73	110	80	57.3	39.2	143.5	104	108.3	104	97.7	24	2	NaN	2	NaN	2008	9	3	1	1	NaN	0	NaN	3.4	NaN	34	2	8	9	2
35	31	1	373	37	3	1	1	1	2	0	2	2	2	NaN	NaN	2	NaN	1	158.7	76	110	80	57.4	40.5	136.4	116.3	100.5	104.6	93.5	25.1	2	NaN	2	NaN	2008	9	3	2	0	6	0	NaN	3	49.5	34.5	2	8	9	2
36	30	1	372	37	2	1	1	1	0	0	0	NaN	NaN	NaN	NaN	NaN	NaN	3	155	74	110	80	58.5	40.7	125.7	109.9	109	104.9	87.4	24.9	2	NaN	2	NaN	2008	9	27	2	1	4	0	NaN	3.5	53.5	34.7	1	9	9	2
37	27	1	404	40	4	2	1	1	0	0	0	NaN	NaN	NaN	NaN	NaN	NaN	3	152	69.5	110	80	56.5	40.2	125.5	104.9	90.5	106.4	84.9	22	2	NaN	2	NaN	2008	8	24	1	1	NaN	0	NaN	2.8	50.1	36.1	1	8	9	1
38	20	1	373	37	3	2	1	1	0	0	0	NaN	NaN	NaN	NaN	NaN	NaN	3	162.8	63	100	70	56	37.5	135.8	101	101.5	97.4	91.5	23.8	2	NaN	2	NaN	2008	9	15	1	1	NaN	0	NaN	3	53	36.4	2	8	9	2
39	26	1	390	39	0	1	1	1	1	0	1	1	NaN	NaN	NaN	NaN	NaN	2	163.4	64	190	90	53.6	52.4	136.5	107	99.4	101.5	91.8	24.3	2	NaN	2	NaN	2008	8	21	2	1	8	0	4	3.5	53.5	35.7	2	8	9	2
40	22	1	393	39	3	2	1	1	0	0	0	NaN	NaN	NaN	NaN	NaN	NaN	3	167.8	68	120	90	56	44.5	141.5	101.5	103.5	97.5	91.2	24.6	2	NaN	2	NaN	2008	8	24	1	1	NaN	0	NaN	4.5	NaN	NaN	1	NaN	NaN	2
41	32	1	362	36	2	2	1	1	1	0	1	1	NaN	NaN	NaN	NaN	NaN	2	161.5	63	110	70	57.2	41.2	133.8	101.4	97.5	99.8	93.2	24.1	2	NaN	2	NaN	2008	8	19	1	1	NaN	0	NaN	2.6	NaN	NaN	1	6	7	2
42	25	1	382	38	2	2	1	1	0	0	0	NaN	NaN	NaN	NaN	NaN	NaN	3	158.5	77	120	80	59.8	42.5	134.2	110.2	98.7	106	91.5	25	2	NaN	2	NaN	2008	9	5	2	1	3	0	NaN	2.9	55.5	35.5	1	6	8	2
43	23	1	420	42	0	NaN	1	1	0	0	0	NaN	NaN	NaN	NaN	NaN	NaN	3	160.5	60	130	90	59.6	38.5	133.2	99.7	95.5	94	89.2	24.5	2	NaN	2	NaN	2008	8	30	2	1	8	0	NaN	2.9	NaN	NaN	2	5	6	2
44	27	1	391	39	1	2	1	1	0	0	0	NaN	NaN	NaN	NaN	NaN	NaN	3	164.4	62	100	80	55.1	41.2	142.5	97.1	105.3	98.4	100.5	24.4	2	NaN	2	NaN	2008	8	26	2	1	8	0	NaN	2.7	NaN	NaN	1	8	9	2
45	23	1	373	37	3	2	1	1	1	0	1	1	NaN	NaN	NaN	NaN	NaN	2	171.2	78	100	60	55.9	44.2	142.8	102.4	110	103.4	99.5	27.2	2	NaN	2	NaN	2008	8	7	1	1	NaN	0	NaN	3.3	NaN	NaN	1	9	10	2
46	28	1	381	38	1	2	1	1	0	0	0	NaN	NaN	NaN	NaN	NaN	NaN	3	151	60	100	60	55.6	38.2	130.2	95.8	96.5	98.2	85.5	23.7	2	NaN	2	NaN	2008	8	24	2	1	3	0	NaN	3	NaN	NaN	1	NaN	NaN	2
47	29	1	375	37	5	1	1	1	0	0	0	NaN	NaN	NaN	NaN	NaN	NaN	3	165.7	95	120	80	56	41.5	145.1	119.8	106.8	117.5	96.5	25.7	2	NaN	2	NaN	2008	9	18	1	1	NaN	0	NaN	3.7	NaN	NaN	2	8	9	2
48	24	1	390	39	0	2	1	1	1	0	1	2	NaN	NaN	NaN	1	NaN	1	158.9	62	100	60	56.7	37.2	131	98.4	103.5	94.4	83.5	25.1	2	NaN	2	NaN	2008	9	9	2	1	1	0	NaN	4	60	37.8	1	8	10	2
49	26	1	372	37	2	2	1	1	1	0	1	1	NaN	NaN	NaN	NaN	NaN	2	151.1	60	110	70	55	38.2	128.2	97.6	92.5	97.9	82.5	24.7	2	NaN	2	NaN	2008	9	22	1	1	NaN	0	NaN	3	51.5	35.8	2	8	9	2
50	29	1	374	37	4	2	1	1	0	0	0	NaN	NaN	NaN	NaN	NaN	NaN	3	162.5	85	130	80	68	45.5	137.3	109.5	96.5	103.5	94.5	27.1	2	NaN	2	NaN	2008	9	20	1	1	NaN	0	NaN	3.4	NaN	NaN	2	6	7	2
51	26	1	390	39	0	1	1	1	1	0	1	1	NaN	NaN	NaN	NaN	NaN	2	156.2	68	100	80	54.6	40.5	130.5	102.1	99.1	101.6	92.5	23.5	2	NaN	2	NaN	2008	9	9	1	1	NaN	0	NaN	3	NaN	NaN	1	7	8	2
52	22	1	412	41	2	1	1	1	0	0	0	NaN	NaN	NaN	NaN	NaN	NaN	3	163.5	58	120	80	54.7	37.5	137.8	82	101.1	97.6	92.5	23.7	2	NaN	2	NaN	2008	9	16	1	1	NaN	0	NaN	2.6	NaN	NaN	1	8	9	2
53	24	1	383	38	3	2	1	1	1	0	1	1	NaN	NaN	NaN	NaN	NaN	2	160	58	110	70	54.6	33.5	135.5	96.8	100.5	93.9	92	23.1	2	NaN	2	NaN	2008	9	15	1	1	NaN	0	NaN	4.1	55.5	37.2	2	8	8	2
54	19	1	414	41	4	2	1	1	0	0	0	NaN	NaN	NaN	NaN	NaN	NaN	3	152	68	110	70	56.9	40.5	125.5	106.5	93.5	103.7	83.5	22.6	2	NaN	2	NaN	2008	9	1	2	1	3	0	11	2.7	51.5	34.9	2	6	8	2
55	26	1	392	39	2	1	1	1	0	0	0	NaN	NaN	NaN	NaN	NaN	NaN	3	151.9	67	110	80	54.3	39.2	133.5	100.7	93.5	98.6	86.9	24.4	2	NaN	2	NaN	2008	9	11	1	1	NaN	0	NaN	3.1	NaN	NaN	2	7	9	2
56	26	1	381	38	1	1	1	1	1	0	1	1	NaN	NaN	NaN	NaN	NaN	2	156.5	64	110	80	56.3	37.5	132	108.9	98.5	94.5	86.5	24.8	2	NaN	2	NaN	2008	10	1	1	1	NaN	0	NaN	3	NaN	NaN	2	8	9	2
57	29	1	380	38	0	1	1	1	0	0	0	NaN	NaN	NaN	NaN	NaN	NaN	3	149.5	60	120	80	58	36.5	125.2	103.3	89.5	95.6	86	21.9	2	NaN	2	NaN	2009	9	26	2	3	8	0	NaN	3	NaN	NaN	1	NaN	NaN	2
58	36	1	380	38	0	1	1	1	1	0	1	1	NaN	NaN	NaN	NaN	NaN	2	150.5	79	120	70	57.8	40.5	123.5	119.8	95.2	113.8	89.1	23.6	2	NaN	2	NaN	2008	9	12	2	1	5	0	NaN	2.9	51.5	34.5	1	7	8	1
59	21	1	380	38	0	2	1	1	0	0	0	NaN	NaN	NaN	NaN	NaN	NaN	3	160	53	100	70	53.7	36.5	136.5	92.3	101.5	89.6	93.5	24.5	2	NaN	2	NaN	2008	9	17	1	1	NaN	0	NaN	3	51.5	35.5	1	8	9	1
60	26	1	386	38	6	1	1	1	0	0	0	NaN	NaN	NaN	NaN	NaN	NaN	3	158.5	66	110	70	56.8	37.5	134.5	101.6	101.1	97.2	89.5	23	2	NaN	2	NaN	2008	9	22	1	1	NaN	0	NaN	3.6	NaN	NaN	1	8	9	2
61	33	1	372	37	2	1	1	1	1	0	1	1	NaN	NaN	NaN	NaN	NaN	2	156.5	59	100	60	56.5	39.2	130.1	98.9	99	96.3	86	23.5	2	NaN	2	NaN	2008	10	3	1	1	NaN	0	NaN	2.9	48	35	2	8	9	2
62	30	2	376	37	6	1	1	1	2	0	2	1	1	NaN	NaN	NaN	NaN	2	156.5	56	115	61	55.5	36.5	130.5	94.7	97.5	95.3	91	23.8	2	NaN	2	NaN	2008	9	23	1	1	NaN	0	NaN	3.3	53	34.7	2	8	9	2
63	38	2	371	37	1	2	1	1	1	1	2	2	2	NaN	NaN	1	10	1	142	60	120	80	55.9	39.5	104.5	106.6	79.5	101.7	77.5	22.9	2	NaN	2	NaN	2008	9	27	2	0	6	0	NaN	2.8	49.5	34.5	2	8	9	2
64	31	2	371	37	1	2	1	1	2	0	2	NaN	2	NaN	NaN	1	NaN	1	150.5	68	100	60	59.8	35.5	128.5	106.5	91.5	98.2	86.5	23.8	2	NaN	2	NaN	2008	9	28	2	3	6	0	NaN	3.1	52	36.8	1	8	9	2
65	35	1	395	39	5	1	1	1	3	0	3	1	1	1	NaN	NaN	NaN	2	159.5	64	105	70	55.4	37.5	136.1	108.3	99.5	97.6	92.5	24.5	2	NaN	2	NaN	2008	9	13	1	1	NaN	0	NaN	4.1	51.5	38.8	1	8	9	2
66	26	1	431	43	1	2	1	1	1	0	1	1	NaN	NaN	NaN	NaN	NaN	2	154.5	66	110	70	55.7	40.5	131.5	98.6	93.5	102.9	89.5	23.5	2	NaN	2	NaN	2008	9	11	1	1	NaN	0	NaN	3.2	NaN	NaN	2	8	9	2
67	37	1	385	38	5	1	1	1	2	0	2	1	1	NaN	NaN	NaN	NaN	2	164.9	82.5	90	60	54.9	39.5	141	106.8	102.5	109.6	91.5	26.8	2	NaN	2	NaN	2008	9	21	1	1	NaN	0	NaN	3.4	51.5	37	2	8	9	2
68	27	1	410	41	0	1	1	1	1	0	1	1	NaN	NaN	NaN	NaN	NaN	2	151.9	82	110	80	55.7	43.2	130.5	102.4	92.5	102.6	91.5	26.1	2	NaN	2	NaN	2008	9	17	1	1	NaN	0	NaN	4.4	54.5	39.6	1	8	10	2
69	20	1	390	39	0	1	1	1	0	0	0	NaN	NaN	NaN	NaN	NaN	NaN	3	153.7	57	80	60	55.8	35.5	128.5	97.5	93.5	94.7	91.5	23.7	2	NaN	2	NaN	2008	9	15	1	1	NaN	0	NaN	3.1	52	35.9	2	6	8	2
70	25	1	371	37	1	1	1	1	1	0	1	2	NaN	NaN	NaN	1	48	1	156	71	120	70	56.5	38.5	134	101.9	100.5	101.5	89.5	25.4	2	NaN	2	NaN	2008	9	26	2	3	6	0	NaN	4	53	36	1	9	10	2
71	38	1	390	39	0	1	1	1	2	0	2	1	1	NaN	NaN	NaN	NaN	2	166.5	85	120	80	57	43.5	142.5	106.3	103	110.9	92.5	25.8	2	NaN	2	NaN	2008	9	28	1	1	NaN	0	NaN	3.4	NaN	NaN	1	8	9	2
72	25	1	376	37	6	1	1	1	1	0	1	2	NaN	NaN	NaN	1	24	1	150	66	110	70	58.2	35.9	129.5	100.3	91.5	95.5	81	23.3	2	NaN	2	NaN	2008	10	8	2	1	6	0	NaN	3	NaN	NaN	2	8	9	2
73	26	1	391	39	1	1	1	1	0	0	0	NaN	NaN	NaN	NaN	NaN	NaN	3	151.5	66.5	110	60	58.5	37.5	127.5	100.6	94.5	102.5	85.2	23.4	2	NaN	2	NaN	2008	9	21	1	1	NaN	0	NaN	2.7	54.5	36.5	2	8	9	2
74	21	1	383	38	3	1	1	1	0	0	0	NaN	NaN	NaN	NaN	NaN	NaN	3	174.5	77	110	70	55.6	43.9	148	98.2	102.5	105.4	101.5	25.4	2	NaN	2	NaN	2008	9	22	1	1	NaN	0	NaN	2.9	51	36	1	8	9	2
75	24	1	395	39	5	2	1	1	0	0	0	NaN	NaN	NaN	NaN	NaN	NaN	3	166.9	68	120	80	55.7	41.5	137.8	102.7	101.5	97.3	94.2	25.7	2	NaN	2	NaN	2008	9	19	1	1	NaN	0	NaN	3.4	55.2	37.1	1	8	9	2
76	23	1	405	40	5	2	1	1	1	0	1	1	NaN	NaN	NaN	NaN	NaN	2	163.5	62	120	80	55.9	41.5	137.5	108.9	96.5	98.8	91.5	24.6	2	NaN	2	NaN	2008	9	23	1	1	NaN	0	NaN	3.3	NaN	NaN	2	9	10	2
77	24	1	390	39	0	1	1	1	1	0	1	2	NaN	NaN	NaN	1	12	1	151.5	53	110	90	54.6	41.5	128.5	89.6	94.9	91.5	88.5	23.5	2	NaN	2	NaN	2008	9	25	2	1	1	0	NaN	2.2	NaN	NaN	2	7	8	2
78	28	1	373	37	3	1	1	1	0	0	0	NaN	NaN	NaN	NaN	NaN	NaN	3	151.5	64	110	70	57.8	36.5	128.5	95	96	99.5	83.5	24.1	2	NaN	2	NaN	2008	9	25	1	1	NaN	0	NaN	3.2	50	34.9	1	7	8	2
79	29	1	403	40	3	2	1	1	2	0	2	1	1	NaN	NaN	NaN	NaN	2	160.5	56	100	80	57.3	40.5	138.5	94.6	103.5	94.6	87.5	24.1	2	NaN	2	NaN	2008	9	24	1	1	NaN	0	NaN	3.1	52	35.7	1	8	9	2
80	22	1	380	38	0	2	1	1	1	0	1	2	NaN	NaN	NaN	1	8	1	155.5	52	110	60	55.7	39.5	132.9	89.9	97.5	90	91	24.5	2	NaN	2	NaN	2008	9	30	2	0	6	0	NaN	3.2	NaN	NaN	2	NaN	NaN	2
82	29	1	374	37	4	1	1	1	1	0	1	1	NaN	NaN	NaN	NaN	NaN	2	155	70	120	70	54.5	41.5	131.5	102.7	98.5	98	92	24.5	2	NaN	2	NaN	2008	13	3	2	1	3	0	NaN	2.9	NaN	NaN	1	7	9	2
83	27	1	384	38	4	2	1	1	2	0	2	1	1	NaN	NaN	NaN	NaN	2	146.5	58	100	60	59.3	39.5	120.5	102.5	87.5	91.8	82.5	24	2	NaN	2	NaN	2008	10	4	1	1	NaN	0	NaN	3.6	62	38.5	1	8	9	2
84	25	1	400	40	0	1	1	1	1	0	1	2	NaN	NaN	NaN	1	26	1	149.5	55	110	80	57.8	35.5	123.5	97.9	94	97.7	83.5	23.8	2	NaN	2	NaN	2008	9	29	2	1	3	0	NaN	3.6	NaN	NaN	2	8	9	2
85	25	1	385	38	5	1	1	1	2	0	2	1	1	NaN	NaN	NaN	NaN	2	155.5	79	130	80	56.9	39.5	134.5	108	98.5	107.9	89.5	24.5	2	NaN	2	NaN	2008	9	27	1	1	NaN	0	NaN	3.9	NaN	NaN	1	9	10	2
86	32	1	410	41	0	1	1	1	1	0	1	1	NaN	NaN	NaN	NaN	NaN	2	158.5	64	120	80	56.2	41.5	134.5	101.5	95.5	96.4	93.5	25.4	2	NaN	2	NaN	2008	9	21	1	1	NaN	0	NaN	3.3	NaN	NaN	2	8	9	2
87	27	1	386	38	6	1	1	1	2	0	2	1	1	NaN	NaN	NaN	NaN	2	161.5	79	110	70	56.8	41.5	137.5	104	100.5	103.2	94.5	23.9	2	NaN	2	NaN	2008	10	9	1	1	NaN	0	NaN	3.8	53	37.5	1	8	9	2
88	25	1	370	37	0	1	1	1	0	0	0	NaN	NaN	NaN	NaN	NaN	NaN	3	158.5	66.5	120	80	57.3	39.5	132.5	98.9	101.5	91.5	99.5	24.6	2	NaN	2	NaN	2008	10	16	1	1	NaN	0	NaN	2.8	50.5	34.8	2	8	9	2
89	28	1	400	40	0	1	1	1	1	0	1	1	NaN	NaN	NaN	NaN	NaN	2	158.5	59	100	80	59	38.5	134.5	97.3	99.5	95.8	90.5	23.5	2	NaN	2	NaN	2008	9	19	1	1	NaN	0	NaN	3.4	NaN	NaN	2	8	9	2
90	26	1	381	38	1	1	1	1	0	0	0	NaN	NaN	NaN	NaN	NaN	NaN	3	154.5	69	120	80	56.7	42.5	132.5	101.8	99.5	102.6	91.5	23.8	2	NaN	2	NaN	2008	10	10	1	1	NaN	0	NaN	3.8	54	36	1	8	10	2
91	27	1	383	38	3	1	1	1	1	0	1	2	NaN	NaN	NaN	1	11	1	150.5	76	110	60	53.2	35.5	126.5	91.8	91.5	80.8	84.5	24	2	NaN	2	NaN	2008	9	29	2	3	6	0	NaN	3	NaN	NaN	2	8	9	2
92	30	1	375	37	5	1	1	1	1	0	1	2	NaN	NaN	NaN	1	NaN	1	160.5	76.5	120	80	60.9	42.5	133.5	98.8	97.5	109.5	86.5	25.6	2	NaN	2	NaN	2008	10	7	2	3	6	0	NaN	3	NaN	NaN	2	8	9	2
93	22	1	386	38	6	2	1	1	1	0	1	1	NaN	NaN	NaN	NaN	NaN	2	151.5	57	120	60	54.6	37.5	127.5	104.5	92	91.5	86.5	22.7	2	NaN	2	NaN	2008	9	24	1	1	NaN	0	NaN	2.5	54	36.4	1	8	9	2
94	35	1	384	38	4	2	1	1	5	0	5	1	1	1	1	NaN	NaN	2	151.5	65	100	60	59.2	39.5	104.5	104.5	91.5	100	84.5	23.1	2	NaN	2	NaN	2009	9	24	1	1	NaN	0	NaN	3.2	NaN	NaN	1	8	9	2
95	24	1	414	41	4	2	1	1	1	0	1	1	NaN	NaN	NaN	NaN	NaN	2	156.5	52	140	80	55.7	36.5	130.5	97.4	98.2	85.6	89.5	25.9	2	NaN	2	NaN	2008	9	21	1	1	NaN	0	NaN	3.4	NaN	NaN	1	8	9	2
96	19	1	371	37	1	2	1	1	0	0	0	NaN	NaN	NaN	NaN	NaN	NaN	3	153	48	110	80	55.2	37.5	128.5	80.9	96.5	82.9	86.5	21.6	2	NaN	2	NaN	2008	10	1	1	1	NaN	0	NaN	2.7	NaN	NaN	2	8	9	2
97	28	1	385	38	5	1	1	1	0	0	0	NaN	NaN	NaN	NaN	NaN	NaN	3	163.5	81	120	80	57.6	42.5	139.5	112.4	102.5	107	91.5	24.6	2	NaN	2	NaN	2008	9	25	1	1	NaN	0	NaN	2.9	NaN	NaN	2	8	9	2
98	23	1	381	38	1	2	1	1	0	0	0	NaN	NaN	NaN	NaN	NaN	NaN	3	155	66	130	80	54.9	38.5	128.5	100.8	96.5	100.3	87.5	24.3	2	NaN	2	NaN	2008	10	2	1	1	NaN	0	NaN	3	NaN	NaN	1	8	9	2
99	35	1	382	38	2	1	1	1	3	0	3	1	1	1	NaN	NaN	NaN	2	159.5	73	100	70	59.2	40.5	134.5	150.8	92.5	101.8	91.5	24.5	2	NaN	2	NaN	2008	10	10	1	1	NaN	0	NaN	3	NaN	NaN	1	8	9	2
100	23	1	370	37	0	1	1	1	1	0	1	2	NaN	NaN	NaN	1	12	1	161.5	61	100	80	57.4	40.5	135.5	101	98.5	92.5	90.5	24.4	2	NaN	2	NaN	2008	10	13	2	3	1	0	NaN	2.8	52.5	33.5	2	7	8	2
101	38	1	386	38	6	1	1	1	3	0	3	1	1	1	NaN	NaN	NaN	2	162.5	75	120	70	56.2	42.5	135	109.8	101.5	108.5	95	25.5	2	NaN	2	NaN	2008	10	8	1	1	NaN	0	NaN	4.4	53	36	1	8	9	2
102	24	1	394	39	4	2	1	1	1	0	1	1	NaN	NaN	NaN	NaN	NaN	2	159.6	75	120	80	54.5	42.5	131.5	106.4	95.5	105.3	89	23.5	2	NaN	2	NaN	2008	9	30	1	1	NaN	0	NaN	2.6	53.5	35.5	1	8	9	2
103	26	1	411	41	1	2	1	1	0	0	0	NaN	NaN	NaN	NaN	NaN	NaN	3	160.5	70	110	80	62.1	46.5	132.5	102.5	100.5	101.5	91.5	25	2	NaN	2	NaN	2008	10	4	1	1	NaN	0	NaN	3.4	NaN	NaN	1	6	7	2
104	33	1	372	37	2	1	1	1	2	0	2	2	1	NaN	NaN	1	12	1	156.5	59	120	80	56.2	39.5	133.5	102.5	95.5	95.6	91.5	22.9	2	NaN	2	NaN	2008	10	22	2	1	8	0	NaN	3	50.2	35.5	2	8	9	2
105	20	1	374	37	4	2	1	1	0	0	0	NaN	NaN	NaN	NaN	NaN	NaN	3	163.5	63	110	70	56.3	40.5	137.5	94	102.5	97.7	96	25.5	2	NaN	2	NaN	2008	9	30	2	1	3	0	NaN	3.2	NaN	NaN	2	7	8	2
106	33	1	385	38	5	2	1	1	1	0	1	1	NaN	NaN	NaN	NaN	NaN	2	162.5	73	140	100	55.1	41	137.5	102.1	98.5	101	102.5	24.9	2	NaN	2	NaN	2008	10	20	1	1	NaN	0	NaN	2.8	51.5	34.5	2	8	9	2
107	25	1	383	38	3	2	1	1	1	1	1	1	NaN	NaN	NaN	NaN	NaN	2	164.5	74	130	80	56.4	40.5	141.5	102.1	101.5	101.5	95.5	24.7	2	NaN	2	NaN	2008	9	26	1	1	NaN	0	NaN	4	NaN	NaN	2	7	8	2
108	25	1	385	38	5	2	1	1	0	0	0	NaN	NaN	NaN	NaN	NaN	NaN	3	153.5	64	120	80	58.8	40	125.5	96.5	92.5	99.8	84.5	21.8	2	NaN	2	NaN	2008	10	12	1	1	NaN	0	NaN	3.4	NaN	NaN	1	7	9	2
109	26	1	405	40	5	1	1	1	1	0	1	2	NaN	NaN	NaN	1	14	1	149	67	110	70	58.2	42.5	135.5	108.3	88	107.3	85	22.4	2	NaN	2	NaN	2008	10	3	2	3	1	0	NaN	3.4	53	34	2	8	9	2
110	26	1	380	38	0	1	1	1	1	0	1	2	NaN	NaN	NaN	1	16	1	155	80	110	70	59.6	40.5	128.5	106.7	93.5	103.3	91.5	24.7	2	NaN	2	NaN	2008	10	7	2	1	8	0	NaN	3.2	51.5	36.5	1	8	9	2
111	21	1	396	39	6	1	1	1	0	0	0	NaN	NaN	NaN	NaN	NaN	NaN	3	155	64	130	80	58.9	36.5	128.5	102.8	94.2	99.8	85.5	23.6	2	NaN	2	NaN	2008	10	10	1	1	NaN	0	NaN	2.9	NaN	NaN	1	7	8	2
112	29	1	376	37	6	2	1	1	1	0	1	2	NaN	NaN	NaN	1	11	1	152.5	88	130	80	59.3	39	130.5	106.4	87.5	122	86.5	24	2	NaN	2	NaN	2008	10	10	2	1	1	0	NaN	3.3	50.5	34.8	2	8	9	2
113	21	1	381	38	1	2	1	1	0	0	0	NaN	NaN	NaN	NaN	NaN	NaN	3	155.5	84	110	80	57.6	40.5	132.5	108.1	94.5	109.6	92.5	24.4	2	NaN	2	NaN	2008	10	22	2	1	5	0	NaN	3.5	50.2	34.5	2	8	9	2
114	20	1	392	39	2	1	1	1	0	0	0	NaN	NaN	NaN	NaN	NaN	NaN	3	158.5	73	120	80	55.5	40.1	140	106.3	101.2	104.3	99	24.9	2	NaN	2	NaN	2008	10	13	1	1	NaN	0	NaN	3.2	51.5	35.5	1	8	9	2
115	27	1	391	39	1	1	1	1	0	0	0	NaN	NaN	NaN	NaN	NaN	NaN	3	149	51	100	70	55.4	37.5	125.5	97.8	92.5	86.6	86.5	21.4	2	NaN	2	NaN	2008	10	4	1	1	NaN	0	NaN	3	NaN	NaN	2	9	10	2
116	37	1	370	37	0	2	1	1	3	0	3	1	1	1	NaN	NaN	NaN	2	161.5	90.5	140	90	58	41.5	134.5	120.9	100.5	108.8	94.5	24.5	2	NaN	2	NaN	2008	10	5	1	1	NaN	0	NaN	2.7	NaN	NaN	1	7	8	2
117	27	1	395	39	5	1	1	1	0	0	0	NaN	NaN	NaN	NaN	NaN	NaN	3	151.5	58	130	90	57.6	41.5	130.5	98.1	98.2	92.8	85.5	23.7	2	NaN	2	NaN	2008	10	14	1	1	NaN	0	NaN	3.2	50.5	36.5	1	8	9	2
119	31	1	402	40	2	1	1	1	1	0	1	1	NaN	NaN	NaN	NaN	NaN	2	155.5	63	100	70	57.3	41.5	131.2	106.5	93	99.9	87.5	23.4	2	NaN	2	NaN	2008	10	14	1	1	NaN	0	NaN	3.5	NaN	NaN	2	8	9	2
120	19	1	371	37	1	1	1	1	0	0	0	NaN	NaN	NaN	NaN	NaN	NaN	3	148.5	60	120	70	56.9	40.5	124	99.8	91	92.7	86.8	22.4	2	NaN	2	NaN	2008	10	23	2	1	5	0	NaN	3.2	51	34.2	2	8	9	2
121	22	1	372	37	2	1	1	1	2	0	2	1	1	NaN	NaN	NaN	NaN	2	156	55	140	90	52.8	37.1	130.5	93.6	96.5	90.5	89.5	23.1	2	NaN	2	NaN	2008	11	3	1	1	NaN	0	NaN	3.6	NaN	NaN	1	8	9	2
122	38	1	382	38	2	1	1	1	0	0	0	NaN	NaN	NaN	NaN	NaN	NaN	3	155.5	91	120	80	59.6	43.5	130.5	109.6	94.5	106	85.5	25	2	NaN	2	NaN	2008	11	5	2	1	3	0	NaN	3.3	53.5	35.5	1	8	9	2
123	21	1	423	42	3	2	1	1	1	0	1	1	NaN	NaN	NaN	NaN	NaN	2	163.4	69	110	70	57.5	44.5	140.5	108.7	105	102.5	95.5	23	2	NaN	2	NaN	2008	10	9	1	1	NaN	0	NaN	3.6	54	39	2	8	9	2
124	28	1	382	38	2	2	1	1	1	0	1	1	NaN	NaN	NaN	NaN	NaN	2	158.5	49	110	70	55.4	37.5	130.5	88	93.5	87.7	89.1	23.1	2	NaN	2	NaN	2008	10	9	1	1	NaN	0	NaN	2.8	49.5	36	1	8	9	2
125	25	1	381	38	1	1	1	1	0	0	0	NaN	NaN	NaN	NaN	NaN	NaN	3	143.5	49	120	90	55	33.5	118.5	90.5	86	88.7	82.5	22.5	2	NaN	2	NaN	2008	10	15	2	1	8	0	NaN	2.9	50	35	1	8	9	2
126	37	1	370	37	0	1	1	1	2	0	2	1	1	NaN	NaN	NaN	NaN	2	155.5	56	100	70	57.4	37.5	131.5	90.5	94.5	91.5	90.5	23.1	2	NaN	2	NaN	2008	10	30	2	1	5	0	NaN	2.7	47	36	1	8	9	2
127	26	1	376	37	6	1	1	1	1	0	1	1	NaN	NaN	NaN	NaN	NaN	2	155.5	61	110	70	54.5	40.5	128	101.9	96	94.7	87.5	24.7	2	NaN	2	NaN	2008	10	28	1	1	NaN	0	NaN	2.8	50.5	34.5	2	8	9	2
128	30	1	376	37	6	1	1	1	1	0	1	2	NaN	NaN	NaN	1	8	1	144.5	71	120	70	53.4	40.1	123.5	106.3	92.5	102.7	85.1	23.7	2	NaN	2	NaN	2008	11	8	2	1	2	0	NaN	3.3	NaN	NaN	1	6	7	2
129	25	1	375	37	5	1	1	1	0	0	0	NaN	NaN	NaN	NaN	NaN	NaN	3	154	51	80	60	56.1	37.2	134	87.5	92.5	82.6	89	23.6	2	NaN	2	NaN	2008	11	2	1	1	NaN	0	NaN	3	55.5	37.1	1	8	9	2
130	38	1	374	37	4	1	1	1	1	0	1	2	NaN	NaN	NaN	1	30	1	152.5	74	130	80	55.9	40.2	131.5	109.5	96.5	111	93.8	24.5	2	NaN	2	NaN	2008	11	12	2	1	8	0	NaN	3.4	59	37.5	1	8	9	2
131	23	1	402	40	2	1	1	1	1	1	2	1	1	NaN	NaN	NaN	NaN	2	167.5	73	110	60	59	43	140.5	109.8	101.5	99.8	87	25.4	2	NaN	2	NaN	2008	10	14	1	1	NaN	0	NaN	3.5	54.5	39	1	8	9	2
132	26	1	423	42	3	1	1	1	0	0	0	NaN	NaN	NaN	NaN	NaN	NaN	3	157.5	89	140	80	58.9	42	138.5	118.2	101.1	111.5	95.5	24.5	2	NaN	2	NaN	2008	10	16	1	1	NaN	0	NaN	NaN	NaN	NaN	1	NaN	NaN	2
133	26	1	411	41	1	2	1	1	1	0	1	1	NaN	NaN	NaN	NaN	NaN	2	165.5	90	120	60	55.7	40.5	137.5	107.1	96.8	107.4	92.5	24	2	NaN	2	NaN	2008	10	24	2	1	1	0	NaN	4.1	52.1	38.3	1	8	9	2
134	28	1	382	38	2	1	1	1	2	0	2	2	2	NaN	NaN	NaN	NaN	1	152	60	100	80	53.2	39.5	127	96.5	94.5	105.7	83.5	24	2	NaN	2	NaN	2008	11	6	1	1	NaN	0	NaN	2.8	NaN	NaN	2	8	9	2
135	26	1	395	39	5	1	1	1	0	0	0	NaN	NaN	NaN	NaN	NaN	NaN	3	157.5	66	100	60	57.1	38	130	101.5	98.1	96.9	93	23.3	2	NaN	2	NaN	2008	11	3	1	1	NaN	0	NaN	3.6	NaN	NaN	2	8	9	2
136	21	1	392	39	2	1	1	1	0	0	0	NaN	NaN	NaN	NaN	NaN	NaN	3	157.5	67	120	80	56.8	39	133	108.7	99.5	101.3	85.5	24.9	2	NaN	2	NaN	2008	10	24	2	1	3	0	NaN	3.1	NaN	NaN	2	8	9	2
137	25	1	390	39	0	1	1	1	0	0	0	NaN	NaN	NaN	NaN	NaN	NaN	3	155.5	63	100	70	52.9	40	128	103.5	94.5	89.5	87.5	24.5	2	NaN	2	NaN	2008	11	13	2	1	5	0	NaN	3.8	NaN	NaN	1	8	9	2
138	25	1	391	39	1	1	1	1	0	0	0	NaN	NaN	NaN	NaN	NaN	NaN	3	155.5	82	130	80	38.5	43.5	130.5	103.5	97.5	108.9	52.5	24.6	2	NaN	2	NaN	2008	10	23	1	1	NaN	0	NaN	3.8	NaN	NaN	1	8	9	2
139	20	1	405	40	5	2	1	1	0	0	0	NaN	NaN	NaN	NaN	NaN	NaN	3	161.5	65	120	90	55.1	40	136	96	102	96	95.5	24.9	2	NaN	2	NaN	2008	10	18	1	1	NaN	0	NaN	2.9	50	35	2	8	10	2
140	25	1	375	37	5	1	1	1	0	0	0	NaN	NaN	NaN	NaN	NaN	NaN	3	164.5	88	140	80	60.8	42.5	140.5	124.4	101.2	108.9	90.5	25.4	2	NaN	2	NaN	2008	11	15	1	1	NaN	0	NaN	3.7	54	36.5	2	8	9	2
141	18	1	402	40	2	1	1	1	0	0	0	NaN	NaN	NaN	NaN	NaN	NaN	3	150	65	100	80	56.6	43.5	125.5	105.5	92	97.5	81.5	23.6	2	NaN	2	NaN	2008	10	27	1	1	NaN	0	NaN	3.2	54.5	36.6	2	8	9	2
142	19	1	394	39	4	1	1	1	0	0	0	NaN	NaN	NaN	NaN	NaN	NaN	3	150.5	61	90	60	59.1	40.5	128.5	98.8	96	95	84.5	23.3	2	NaN	2	NaN	2008	10	25	1	1	NaN	0	NaN	3.2	NaN	NaN	2	7	8	2
143	22	1	374	37	4	2	1	1	0	0	0	NaN	NaN	NaN	NaN	NaN	NaN	3	161	70	100	80	55.5	40	136.5	97.5	102.5	100.9	94	25.6	2	NaN	2	NaN	2008	11	15	1	1	NaN	0	NaN	3.3	NaN	NaN	1	8	9	2
144	30	1	403	40	3	1	1	1	1	0	1	2	NaN	NaN	NaN	1	72	1	158	64	120	70	58.5	39.5	130.5	102.2	95.3	98	91.5	23.8	2	NaN	2	NaN	2008	10	28	2	3	6	0	NaN	3.1	NaN	NaN	2	8	9	2
145	22	1	404	40	4	1	1	1	0	0	0	NaN	NaN	NaN	NaN	NaN	NaN	3	172.5	73	110	70	61.5	41.1	145.5	102.6	104.5	102.5	98.5	26.3	2	NaN	2	NaN	2008	10	28	1	1	NaN	0	NaN	3.3	NaN	NaN	2	7	8	2
146	35	1	383	38	3	2	1	1	1	0	1	2	NaN	NaN	NaN	1	NaN	1	156	72	140	100	60.9	41.5	130	116.1	92.5	102.8	86.5	25.8	2	NaN	2	NaN	2008	11	19	2	1	8	0	NaN	2.7	NaN	NaN	2	6	7	2
147	35	1	380	38	0	2	1	1	2	0	2	1	1	NaN	NaN	NaN	NaN	2	150	50	120	80	53.8	38.7	124.3	94	90.5	91.6	88.5	24	2	NaN	2	NaN	2008	11	1	1	1	NaN	0	NaN	2.5	52	33.2	2	8	9	2
148	19	1	376	37	6	1	1	1	0	0	0	NaN	NaN	NaN	NaN	NaN	NaN	3	149	58.5	100	80	60.9	35.5	126.8	94	92.5	93.7	81.5	23.4	2	NaN	2	NaN	2008	11	11	1	1	NaN	0	NaN	3.5	NaN	NaN	1	8	9	2
149	20	1	375	37	5	2	1	1	1	0	1	2	NaN	NaN	NaN	1	24	1	144.5	54	110	80	58.7	35.5	118	98.6	88.5	89.6	88.5	22.9	2	NaN	2	NaN	2008	10	6	2	1	1	0	NaN	2.8	54	39.5	2	8	9	2
150	35	1	370	37	0	2	1	1	2	0	2	1	1	NaN	NaN	NaN	NaN	2	156.5	63	130	90	54.6	36.5	128.5	95.8	98	95.8	86	22.8	2	NaN	2	NaN	2009	10	3	1	1	NaN	0	NaN	NaN	NaN	NaN	1	7	8	2
151	40	1	374	37	4	1	1	1	5	0	5	1	1	1	1	NaN	NaN	2	153.5	67	140	80	58.2	37.5	130.5	103	96	102.5	92.5	23.6	2	NaN	2	NaN	2008	11	25	1	1	NaN	0	NaN	3	50	34	1	8	9	2
152	24	1	401	40	1	1	1	1	0	0	0	NaN	NaN	NaN	NaN	NaN	NaN	3	158.5	72	120	60	56.4	41.5	135	105.9	96.5	101.6	88	23.9	2	NaN	2	NaN	2008	11	7	1	1	NaN	0	NaN	3.5	50	35.4	2	8	9	2
153	30	1	374	37	4	2	1	1	1	0	1	2	NaN	NaN	NaN	1	28	1	149.5	72	100	60	54.7	36.7	126.5	109.6	90.5	103.7	81.5	23.4	2	NaN	2	NaN	2008	11	7	1	1	NaN	0	NaN	3.3	NaN	NaN	2	7	8	2
154	20	1	395	39	5	2	1	1	0	0	0	NaN	NaN	NaN	NaN	NaN	NaN	3	160	60	110	70	59.4	36.5	136	93.4	101.5	89.5	90	25.4	2	NaN	2	NaN	2008	10	30	1	1	NaN	0	NaN	2.8	NaN	NaN	2	8	9	2
155	37	1	385	38	5	1	1	1	1	0	1	1	NaN	NaN	NaN	NaN	NaN	2	155.5	77	120	80	59.4	40.5	128	110.5	97.5	108.5	90.2	24.7	2	NaN	2	NaN	2008	11	18	1	1	NaN	0	NaN	3.8	NaN	NaN	2	8	9	2
156	23	1	401	40	1	1	1	1	0	0	0	NaN	NaN	NaN	NaN	NaN	NaN	3	157.5	59	100	70	59	37.8	131.5	90.5	94.5	90	90.5	25.8	2	NaN	2	NaN	2008	11	1	1	1	NaN	0	NaN	3.4	NaN	NaN	2	8	9	2
157	25	1	385	38	5	1	1	1	0	0	0	NaN	NaN	NaN	NaN	NaN	NaN	3	154.5	75.5	100	70	57	37.5	135	106	95	105.1	87	23	2	NaN	2	NaN	2008	11	15	2	3	6	0	NaN	3.3	50	34	2	7	8	2
158	25	1	420	42	0	1	1	1	3	0	3	1	1	1	NaN	NaN	NaN	2	163.5	55	100	80	56.2	35.5	134.5	101	102.5	92.5	94.5	25.4	2	NaN	2	NaN	2008	11	5	1	1	NaN	0	NaN	3.6	NaN	NaN	1	8	9	2
159	20	1	420	42	0	2	1	1	1	0	1	1	NaN	NaN	NaN	NaN	NaN	2	157.5	69	100	60	58.4	39.5	133.5	106.5	93	97.6	83.5	23.5	2	NaN	2	NaN	2008	11	6	1	1	NaN	0	NaN	3.5	NaN	NaN	2	NaN	NaN	2
160	22	1	421	42	1	2	1	1	0	0	0	NaN	NaN	NaN	NaN	NaN	NaN	3	160	58	120	80	57.1	38.2	132.5	97.6	95	96.4	87.5	24.1	2	NaN	2	NaN	2008	11	10	1	1	NaN	0	NaN	3.5	NaN	NaN	1	8	9	2
161	31	1	394	39	4	1	1	1	1	0	1	1	NaN	NaN	NaN	NaN	NaN	2	158.5	75	120	70	60.2	40	133.5	102.8	93.5	106.9	87.5	24	2	NaN	2	NaN	2008	11	14	1	1	NaN	0	NaN	2.8	51	35.4	2	8	9	2
162	26	1	420	42	0	1	1	1	0	0	0	NaN	NaN	NaN	NaN	NaN	NaN	3	152	73	120	70	56.1	40.1	130	104.5	90	106.4	83	23.6	2	NaN	2	NaN	2008	11	13	2	1	3	0	NaN	2.3	50	34	2	8	9	2
163	18	1	384	38	4	1	1	1	0	0	0	NaN	NaN	NaN	NaN	NaN	NaN	3	148.5	58	110	80	55.5	39.5	128	98.9	90.5	94.5	86	22.9	2	NaN	2	NaN	2008	11	13	2	1	5	0	NaN	2.3	50.5	36	2	8	9	2
164	23	1	386	38	6	1	1	1	0	0	0	NaN	NaN	NaN	NaN	NaN	NaN	3	165	64	120	80	55.5	39.2	140	96	101	97	94.5	22	2	NaN	2	NaN	2008	11	22	1	1	NaN	0	NaN	3.2	NaN	NaN	2	7	8	2
165	21	1	382	38	2	1	1	1	0	0	0	NaN	NaN	NaN	NaN	NaN	NaN	2	166	81	110	70	55.4	42.5	140	111.4	103.5	105.8	91.4	25.1	2	NaN	2	NaN	2008	11	21	1	1	NaN	0	NaN	3.5	NaN	NaN	1	8	9	2
166	28	1	412	41	2	2	1	1	0	0	0	NaN	NaN	NaN	NaN	NaN	NaN	3	164.5	83.5	120	80	60.2	42.1	135.5	110.1	102.4	108.6	92.5	25.5	2	NaN	2	NaN	2008	11	12	1	1	NaN	0	NaN	4.3	NaN	NaN	1	8	9	2
167	26	1	394	39	4	2	1	1	0	0	0	NaN	NaN	NaN	NaN	NaN	NaN	3	157	56	100	70	57	41	130	96	96.5	90	92.5	23.1	2	NaN	2	NaN	2008	11	9	1	1	NaN	0	NaN	3	NaN	NaN	2	8	9	2
169	28	1	432	43	2	2	1	1	0	0	0	NaN	NaN	NaN	NaN	NaN	NaN	3	169.5	75	150	100	56.6	40	142.5	102.3	108	98.2	100	27.2	2	NaN	2	NaN	2008	11	11	1	1	NaN	0	NaN	4.7	59.5	37.5	1	9	10	2
170	30	1	394	39	4	1	1	1	1	0	1	2	NaN	NaN	NaN	1	24	1	157	59	110	90	58.2	36.5	131.5	89.2	96.5	90.6	85	23.2	2	NaN	2	NaN	2008	11	27	2	1	2	0	NaN	2.2	NaN	NaN	2	6	9	2
171	24	1	374	37	4	1	1	1	1	0	1	1	NaN	NaN	NaN	NaN	NaN	2	144	46	120	60	53.3	32	120.5	93.5	92.5	91.3	82.8	22.1	2	NaN	2	NaN	2008	12	5	1	1	NaN	0	NaN	3.5	NaN	NaN	2	8	9	2
172	27	1	410	41	0	2	1	1	0	0	0	NaN	NaN	NaN	NaN	NaN	NaN	3	155	73	110	80	57.4	39.1	128.5	106.5	95	105.5	85	24	2	NaN	2	NaN	2008	11	14	2	1	1	0	NaN	3.8	51.5	36.5	2	7	8	2
173	29	1	376	37	6	1	1	1	1	0	1	1	NaN	NaN	NaN	2	NaN	2	156	74	100	80	59.8	41	128.5	107.8	96	104.3	92	20.8	2	NaN	2	NaN	2008	11	24	1	1	NaN	0	NaN	2.8	50	36	2	7	8	2
174	26	1	400	40	0	1	1	1	1	0	1	1	NaN	NaN	NaN	NaN	NaN	2	165.5	68.5	110	70	54.7	37.5	137	106.4	101.5	103.9	93.5	23.7	2	NaN	2	NaN	2008	11	24	1	1	NaN	0	NaN	3.5	53	36	1	8	9	2
175	23	1	386	38	6	2	1	1	0	0	0	NaN	NaN	NaN	NaN	NaN	NaN	3	158	63	100	60	57.1	40	132.4	95.9	97	93.5	86	23.9	2	NaN	2	NaN	2008	11	24	2	1	5	0	NaN	2.5	47	35	2	7	8	2
176	33	1	394	39	4	2	1	1	2	0	2	1	1	NaN	NaN	NaN	NaN	2	152	92	110	80	65.8	38.5	126	126.2	125.5	114.7	83.5	21.9	2	NaN	2	NaN	2008	11	16	2	1	3	0	NaN	3.6	NaN	NaN	1	8	9	2
177	28	1	422	42	2	1	1	1	2	1	3	1	1	1	NaN	NaN	NaN	2	160.5	75	130	90	56.7	39	133	111	101	111.2	89.5	23.5	2	NaN	2	NaN	2008	11	14	1	1	NaN	0	NaN	3.2	NaN	NaN	2	7	8	2
178	25	1	400	40	0	1	1	1	3	1	4	1	1	1	1	NaN	NaN	2	164.5	77	120	70	56.5	37.2	134	119.5	97.5	102.5	90.5	24.4	2	NaN	2	NaN	2008	11	15	1	1	NaN	0	NaN	4.5	NaN	NaN	1	7	8	2
179	38	1	402	40	2	1	1	1	3	0	3	1	1	1	NaN	NaN	NaN	2	161.5	77	100	70	57.2	40	135.5	106.5	101.5	105.2	92	25.3	2	NaN	2	NaN	2008	11	23	1	1	NaN	0	NaN	3.7	54.5	36	1	9	10	2
180	22	1	370	37	0	1	1	1	0	0	0	NaN	NaN	NaN	NaN	NaN	NaN	3	150.5	59	100	79	57	37.5	124.5	96.5	90	96.3	82	23.5	2	NaN	2	NaN	2008	12	30	2	1	3	0	NaN	2.9	NaN	NaN	1	8	9	2
181	22	1	390	39	0	1	1	1	0	1	1	1	NaN	NaN	NaN	NaN	NaN	2	155.5	85	120	80	58.3	40	131	118.2	96.5	111.4	86.5	25.1	2	NaN	2	NaN	2008	12	2	2	1	6	0	NaN	4.2	NaN	NaN	1	8	9	2
182	31	1	392	39	2	1	1	1	1	0	1	1	NaN	NaN	NaN	NaN	NaN	2	153.5	61	120	80	59	37.5	128	125	93	98.3	86.5	22.7	2	NaN	2	NaN	2008	11	24	1	1	NaN	0	NaN	2.8	NaN	NaN	1	8	9	2
183	33	1	373	37	3	1	1	1	0	0	0	NaN	NaN	NaN	NaN	NaN	NaN	3	165.5	88	120	80	56.1	38	140.5	114.5	97	116.6	94.5	25.3	2	NaN	2	NaN	2008	12	5	1	1	NaN	0	NaN	3.7	NaN	NaN	2	7	9	2
184	35	1	376	37	6	2	1	1	2	0	2	1	1	NaN	NaN	NaN	NaN	2	160.5	61	110	70	57	37.5	137.5	100.4	99.5	103	96	24.5	2	NaN	2	NaN	2008	12	12	1	1	NaN	0	NaN	3.2	NaN	NaN	2	7	8	2
185	26	1	386	38	6	2	1	1	1	0	1	1	NaN	NaN	NaN	NaN	NaN	2	157.5	55	110	70	53.4	38.5	130.5	92.5	100.5	88.4	86	23.8	2	NaN	2	NaN	2008	11	21	1	1	NaN	0	NaN	3.2	49.8	35.2	2	8	9	2
186	27	1	386	38	6	2	1	1	3	0	3	1	1	1	NaN	NaN	NaN	2	162.5	68	100	70	60.6	35.5	136	102.5	101	100.9	93.5	26.1	2	NaN	2	NaN	2008	11	27	1	1	NaN	0	NaN	2.8	51	38.1	1	8	9	2
187	38	1	385	38	5	2	1	1	3	0	3	1	1	1	NaN	NaN	NaN	2	163.5	81	130	80	55	45	135.5	113	98.4	110.5	94	24.3	2	NaN	2	NaN	2008	11	26	1	1	NaN	0	NaN	3.2	NaN	NaN	2	8	9	2
188	25	1	402	40	2	1	1	1	0	0	0	NaN	NaN	NaN	NaN	NaN	NaN	3	150.5	43	80	60	55.3	36.5	123	86	86.5	76.7	79	22.9	2	NaN	2	NaN	2008	11	22	2	3	6	0	NaN	3.3	NaN	NaN	2	8	9	2
189	25	1	380	38	0	2	1	1	0	0	0	NaN	NaN	NaN	NaN	NaN	NaN	3	147.5	55	140	80	55	40	124.5	91.5	94.5	93	90.3	21.9	2	NaN	2	NaN	2008	11	21	1	1	NaN	0	NaN	3	NaN	NaN	2	8	9	2
190	31	1	383	38	3	1	1	1	1	0	1	2	NaN	NaN	NaN	1	8	1	155	70	130	80	57.8	39	130	104.6	93.4	98.8	89.5	23.5	2	NaN	2	NaN	NaN	NaN	NaN	2	3	6	0	NaN	3.1	49	35	1	8	9	2
192	28	1	370	37	0	1	1	1	0	0	0	NaN	NaN	NaN	NaN	NaN	NaN	3	148.5	49	100	70	56.7	41	123.2	99.6	88	97	82.5	22.4	2	NaN	2	NaN	2008	12	21	1	1	NaN	0	NaN	2.9	50	35	2	7	8	2
193	29	1	390	39	0	1	1	1	1	0	1	1	NaN	NaN	NaN	NaN	NaN	2	156.5	55.5	90	60	57	35.5	131	94	100.5	89.6	90.5	23.6	2	NaN	2	NaN	2008	12	7	2	1	3	0	NaN	3.4	58.5	35.5	1	8	9	2
194	25	1	416	41	6	1	1	1	0	0	0	NaN	NaN	NaN	NaN	NaN	NaN	3	152	69	140	100	56.5	41	138.5	110	94.5	105.4	85.5	24.1	2	NaN	2	NaN	2008	11	22	1	1	NaN	0	NaN	2.7	48	34	2	8	9	2
195	26	1	380	38	0	1	1	1	1	0	1	2	NaN	NaN	NaN	1	2	1	150.5	53	120	80	57.9	39.5	125.5	95.6	93.5	92.8	85.5	22.1	2	NaN	2	NaN	2008	12	2	2	3	6	0	NaN	3.7	NaN	NaN	2	8	9	2
196	23	1	380	38	0	1	1	1	0	0	0	NaN	NaN	NaN	NaN	NaN	NaN	3	151	60	110	80	55.7	36.5	127	99.5	92.5	92.9	83.5	23.7	2	NaN	2	NaN	2008	12	10	1	1	NaN	0	NaN	3.1	49	33	2	8	9	2
197	27	1	380	38	0	1	1	1	0	0	0	NaN	NaN	NaN	NaN	NaN	NaN	3	162	65	110	70	54.3	36.5	135.5	101.6	99.5	96.9	92.5	25.5	2	NaN	2	NaN	2008	11	25	2	1	1	0	NaN	3.9	53	35	1	8	9	2
198	25	1	370	37	0	2	1	1	1	0	1	1	NaN	NaN	NaN	NaN	NaN	2	154.5	55	100	70	54.5	38	128	87.5	95	91	89	23.5	2	NaN	2	NaN	2008	12	20	1	1	NaN	0	NaN	3.6	NaN	NaN	2	8	9	2
199	33	1	371	37	1	2	1	1	3	0	3	1	1	1	NaN	NaN	NaN	2	155.5	65	100	60	57	36	131.5	98.5	98.5	100.4	88	22.9	2	NaN	2	NaN	2009	1	7	1	1	NaN	0	NaN	3.5	NaN	NaN	1	8	9	2
200	35	1	374	37	4	1	1	1	2	0	2	1	1	NaN	NaN	NaN	NaN	2	162.5	60	100	70	57.5	37.5	135	97.8	101.5	93.2	93.5	25.3	2	NaN	2	NaN	2008	12	13	1	1	NaN	0	NaN	3.2	47	36.5	2	8	9	2
201	26	1	382	38	2	2	1	1	1	0	1	1	NaN	NaN	NaN	NaN	NaN	2	157.5	68	110	70	56.9	38.5	130.5	102.7	98.5	98.5	90	23.1	2	NaN	2	NaN	2008	12	11	1	1	NaN	0	NaN	3.1	NaN	NaN	2	8	9	2
203	27	1	390	39	0	2	1	1	0	0	0	NaN	NaN	NaN	NaN	NaN	NaN	3	151	69	110	70	56	38	125	123.5	93.5	104.5	91.2	22.4	2	NaN	2	NaN	2008	12	15	2	1	3	0	NaN	3.3	NaN	NaN	1	8	9	2
204	32	1	371	37	1	1	1	1	3	0	3	2	2	2	NaN	1	NaN	1	166	85	110	70	59.8	39.5	140	117.4	100.5	111.9	94.5	26.2	2	NaN	2	NaN	2008	12	17	2	3	6	0	NaN	3.7	54.5	38	2	8	9	2
205	19	1	386	38	6	2	1	1	0	0	0	NaN	NaN	NaN	NaN	NaN	NaN	3	165.5	71	120	80	56.8	43.5	131.5	98.2	100.5	96.2	89	26.2	2	NaN	2	NaN	2009	2	18	1	1	NaN	0	NaN	3	NaN	NaN	2	8	9	2
206	28	1	376	37	6	1	1	1	1	0	1	1	NaN	NaN	NaN	NaN	NaN	2	153	67	110	70	54.3	39	129	103	94.5	97.3	83.5	23.5	2	NaN	2	NaN	2008	12	13	1	1	NaN	0	NaN	3	54	36	1	8	9	2
207	28	1	381	38	1	2	1	1	2	0	2	1	1	NaN	NaN	NaN	NaN	2	143.5	62	100	70	54.6	35	116.5	104.4	87	96.3	82	23.7	2	NaN	2	NaN	2008	11	30	1	1	NaN	0	NaN	2.9	NaN	NaN	2	8	9	2
208	25	1	386	38	6	1	1	1	1	0	1	2	NaN	NaN	NaN	NaN	NaN	1	159	66	120	80	57	40	129	100	98.5	93.2	87.5	25.2	2	NaN	2	NaN	2008	12	2	2	1	1	0	NaN	3.3	50	35	2	8	9	2
209	26	1	402	40	2	1	1	1	0	0	0	NaN	NaN	NaN	NaN	NaN	NaN	3	157.5	80	140	100	57.4	41	131.2	103.6	99.5	106	97.5	24.2	2	NaN	2	NaN	2008	12	7	1	1	NaN	0	NaN	3.4	NaN	NaN	1	7	8	2
210	22	1	372	37	2	1	1	1	1	0	1	1	NaN	NaN	NaN	NaN	NaN	2	158	68	100	70	58.1	40	131	98.9	97.5	102	88.5	24.2	2	NaN	2	NaN	2009	12	18	1	1	NaN	0	NaN	3.2	NaN	NaN	1	8	9	2
211	20	1	375	37	5	2	1	1	0	0	0	NaN	NaN	NaN	NaN	NaN	NaN	3	159	60	120	80	56.7	41.2	132	90.9	96.5	90	95.6	25	2	NaN	2	NaN	2008	13	1	1	1	NaN	0	NaN	3.7	NaN	NaN	1	8	9	2
212	21	1	392	39	2	2	1	1	0	0	0	NaN	NaN	NaN	NaN	NaN	NaN	3	157	60.5	100	80	53.5	40	129.9	96.5	90.5	95.5	88.5	24.3	2	NaN	2	NaN	2008	12	17	1	1	NaN	0	NaN	3.4	NaN	NaN	1	8	9	2
213	34	1	414	41	4	1	1	1	0	0	0	NaN	NaN	NaN	NaN	NaN	NaN	2	157	82	130	80	55.5	37.3	134.3	111.5	92.3	101.3	92	22.9	2	NaN	2	NaN	2008	12	9	2	1	1	0	NaN	3.2	50	35	1	7	9	2
214	35	1	410	41	0	1	1	1	2	0	2	1	1	NaN	NaN	NaN	NaN	2	152	78	110	70	54.2	40	134.2	106.5	92.1	104.5	89	24.5	2	NaN	2	NaN	2008	12	6	1	1	NaN	0	NaN	2.9	50	35	2	6	8	2
215	28	1	394	39	4	1	1	1	0	0	0	NaN	NaN	NaN	NaN	NaN	NaN	3	154.5	68	120	70	55	38.5	128.5	104.2	94	101.5	81	21.5	2	NaN	2	NaN	2008	12	24	2	1	3	0	NaN	3.6	52	35	2	8	9	2
216	20	1	375	37	5	2	1	1	0	0	0	NaN	NaN	NaN	NaN	NaN	NaN	3	147.5	58	110	70	55.2	36.5	122.5	102.6	87.9	79	83	23.5	2	NaN	2	NaN	2009	1	1	2	1	3	0	NaN	3.9	NaN	NaN	2	8	9	2
217	28	1	416	41	6	1	1	1	0	0	0	NaN	NaN	NaN	NaN	NaN	NaN	3	160.5	70	120	80	55	40.5	137.8	103.5	102.3	99.5	98.5	24.6	1	8	2	NaN	2008	12	10	1	1	NaN	0	NaN	2.7	NaN	NaN	NaN	NaN	NaN	1
218	27	1	393	39	3	2	1	1	2	0	2	1	1	NaN	NaN	NaN	NaN	2	160	92	120	80	58.5	40	137	111.3	100	112.8	93	25.5	2	NaN	2	NaN	2008	12	13	1	1	NaN	0	NaN	3	NaN	NaN	2	8	9	2
219	35	1	381	38	1	1	1	1	2	0	2	1	1	NaN	NaN	NaN	NaN	2	158.5	70	90	70	55	43.5	134.5	108.3	103.5	101	98.7	23.9	2	NaN	2	NaN	2008	12	19	1	1	NaN	0	NaN	3.5	NaN	NaN	1	8	9	2
220	22	1	384	38	4	1	1	1	0	0	0	NaN	NaN	NaN	NaN	NaN	NaN	3	156.5	75	110	80	57.5	42.5	131.5	106.9	96.3	103.4	92.5	25	2	NaN	2	NaN	2008	13	2	1	1	NaN	0	NaN	3.9	NaN	NaN	2	8	9	2
221	33	1	373	37	3	1	1	1	0	0	0	NaN	NaN	NaN	NaN	NaN	NaN	3	162.5	84	120	80	59.6	43.5	138.5	119.5	100.5	108.5	95.5	24.3	2	NaN	2	NaN	2008	12	27	1	1	NaN	0	NaN	3.5	NaN	NaN	2	8	9	2
222	30	1	380	38	0	2	1	1	1	0	1	1	NaN	NaN	NaN	NaN	NaN	2	162.5	67	140	80	55.5	38.5	133.3	100.8	101.5	99	97.3	24.2	2	NaN	2	NaN	2008	12	16	1	1	NaN	0	NaN	3.4	46	36.5	1	8	9	2
223	35	1	382	38	2	1	1	1	1	0	1	1	NaN	NaN	NaN	NaN	NaN	2	152	68	90	60	54.8	42	128.3	104.2	92.7	101	92.9	22.4	2	NaN	2	NaN	2008	12	17	1	1	NaN	0	NaN	3.1	NaN	NaN	2	8	9	2
225	24	1	396	39	6	2	1	1	0	0	0	NaN	NaN	NaN	NaN	NaN	NaN	3	164	60	110	70	55.4	37	133	101.9	102.7	89	96.2	25.2	2	NaN	2	NaN	2008	12	28	1	1	NaN	0	NaN	3.1	NaN	NaN	2	8	9	2
226	21	1	382	38	2	1	1	1	0	0	0	NaN	NaN	NaN	NaN	NaN	NaN	3	159.5	57	100	70	56.4	40.5	130.3	93.3	101.4	94.5	95.5	23	2	NaN	2	NaN	2008	12	20	1	1	NaN	0	NaN	2.6	NaN	NaN	1	8	9	2
227	19	1	384	38	4	2	1	1	0	0	0	NaN	NaN	NaN	NaN	NaN	NaN	3	162	62	130	90	55.9	38.5	133.5	105.5	96.5	99	92.3	26.5	2	NaN	2	NaN	2008	12	14	1	1	NaN	0	NaN	2.8	NaN	NaN	1	8	9	2
228	21	1	376	37	6	1	1	1	0	0	0	NaN	NaN	NaN	NaN	NaN	NaN	3	160.5	60	100	70	54	37.5	135.5	95	98.5	87.8	94.5	24.9	2	NaN	2	NaN	2008	13	5	1	1	NaN	0	NaN	3.1	47	35	1	8	9	2
229	27	1	421	42	1	1	1	1	0	0	0	NaN	NaN	NaN	NaN	NaN	NaN	3	155.5	72	130	90	57	40.5	130.5	103	94.5	100.5	91.5	22.7	1	6	2	NaN	2008	13	4	1	1	NaN	0	NaN	2.6	NaN	NaN	1	NaN	NaN	1
230	29	1	423	42	3	2	1	1	2	0	2	1	1	NaN	NaN	NaN	NaN	2	162.5	78.5	110	80	54.5	38	134	104.3	95.5	107.5	91.3	24.7	2	NaN	2	NaN	2009	12	18	1	1	NaN	0	NaN	3.1	NaN	NaN	2	NaN	NaN	2
231	32	1	376	37	6	1	1	1	4	0	4	1	1	1	1	NaN	NaN	2	153.5	58	110	70	54	37	127	101.5	95	91	88	25.1	2	NaN	2	NaN	2008	12	26	2	1	1	0	NaN	3.4	47.5	37	1	6	8	2
232	20	1	391	39	1	1	1	1	0	0	0	NaN	NaN	NaN	NaN	NaN	NaN	3	152	54.5	100	70	52.8	36	93.3	129	95	94.5	91.2	23.1	2	NaN	2	NaN	2008	13	1	1	1	NaN	0	NaN	2.3	47	35	2	7	8	2
233	20	1	383	38	3	2	1	1	0	0	0	NaN	NaN	NaN	NaN	NaN	NaN	3	156.5	66	100	70	58	41	131.5	99.1	94.5	98.2	87.1	24.7	2	NaN	2	NaN	2008	12	29	1	1	NaN	0	NaN	2.7	NaN	NaN	2	8	9	2
234	25	1	391	39	1	2	1	1	1	0	1	1	NaN	NaN	NaN	NaN	NaN	2	163.5	88	130	100	59.5	45	138.5	118.7	104	115	94.5	25	2	NaN	2	NaN	2009	12	20	1	1	NaN	0	NaN	NaN	NaN	NaN	2	NaN	NaN	2
235	21	1	373	37	3	2	1	1	1	0	1	1	NaN	NaN	NaN	NaN	NaN	2	153.5	69	120	80	58.5	42	126.5	102.6	91.5	96.2	88	22.5	2	NaN	2	NaN	2008	12	30	1	1	NaN	0	NaN	3.3	NaN	NaN	1	9	10	2
236	28	1	390	39	0	2	1	1	2	0	2	1	1	NaN	NaN	NaN	NaN	2	161	50	110	80	53.7	36	132	92.5	101	87.8	96	23.4	2	NaN	2	NaN	2008	12	17	1	1	NaN	0	NaN	3.5	NaN	NaN	1	8	9	2
238	29	1	374	37	4	2	1	1	1	0	1	1	NaN	NaN	NaN	NaN	NaN	2	161	58	100	80	52	34	132	95.7	100.5	95.5	91.7	24	2	NaN	2	NaN	2009	1	19	1	1	NaN	0	NaN	3.2	NaN	NaN	1	8	9	2
239	26	1	384	38	4	1	1	1	1	0	1	1	NaN	NaN	NaN	NaN	NaN	2	161	66	120	70	57.5	42	137	97	100	96.5	96	24	2	NaN	2	NaN	2009	12	30	1	1	NaN	0	NaN	2.8	NaN	NaN	2	8	9	2
240	32	1	383	38	3	2	1	1	3	0	3	1	1	1	NaN	NaN	NaN	2	164	82	110	70	56	42.5	138.5	111.5	101	108	96	23.9	2	NaN	2	NaN	2008	12	30	1	1	NaN	0	NaN	2.8	NaN	NaN	2	8	9	2
241	28	1	393	39	3	1	1	1	0	0	0	NaN	NaN	NaN	NaN	NaN	NaN	3	149.5	53.5	96	60	55.8	38.5	123	92	95.6	91.2	89	23.4	2	NaN	2	NaN	2008	12	27	2	1	8	0	NaN	3.4	NaN	NaN	2	8	9	2
242	26	1	395	39	5	2	1	1	1	0	1	2	NaN	NaN	NaN	1	48	1	145.5	44	110	60	55	31	121	83.2	86.5	81.7	84	22.4	2	NaN	2	NaN	2008	13	4	2	3	6	0	NaN	3	NaN	NaN	1	8	9	2
243	25	1	374	37	4	2	1	1	0	0	0	NaN	NaN	NaN	NaN	NaN	NaN	3	153.5	68	110	70	56	35.5	128	96.5	92.5	94.5	90.3	22.7	2	NaN	2	NaN	2009	1	24	2	1	3	0	NaN	2.7	NaN	NaN	1	8	9	2
244	25	1	381	38	1	2	1	1	0	0	0	NaN	NaN	NaN	NaN	NaN	NaN	3	157.5	55	120	80	52.7	41	137.5	91	99.3	89.7	94	25.4	2	NaN	2	NaN	2009	1	9	2	1	3	0	NaN	2.3	NaN	NaN	1	5	6	2
245	30	1	402	40	2	1	1	1	3	0	3	1	1	1	NaN	NaN	NaN	2	153.5	62.5	100	60	54.6	37.5	125.9	109	94.5	81	98.5	23.3	2	NaN	2	NaN	2008	13	4	1	1	NaN	0	NaN	3.9	50	36	2	8	9	2
246	27	1	396	39	6	2	1	1	0	0	0	NaN	NaN	NaN	NaN	NaN	NaN	3	152	49.5	100	70	49	40	123	93	94	87	89	22.4	2	NaN	2	NaN	2009	1	12	2	1	2	0	NaN	3.3	NaN	NaN	1	7	8	2
247	22	1	374	37	4	2	1	1	0	0	0	NaN	NaN	NaN	NaN	NaN	NaN	3	158	67	120	80	56	42	128.5	98.5	100	103	92.5	24	2	NaN	2	NaN	2009	1	17	1	1	NaN	0	NaN	3.9	NaN	NaN	1	8	9	2
248	18	1	390	39	0	2	1	1	0	0	0	NaN	NaN	NaN	NaN	NaN	NaN	3	161.5	57.5	110	80	51	37	137.5	90.3	96	90	102.5	23.5	2	NaN	2	NaN	2009	1	10	1	1	NaN	0	NaN	3.3	NaN	NaN	2	8	9	2
249	26	1	390	39	0	1	1	1	0	0	0	NaN	NaN	NaN	NaN	NaN	NaN	3	156	54	80	60	51.9	39	130	89.7	96.5	91	93.5	24.6	2	NaN	2	NaN	2009	1	17	2	1	3	0	NaN	2.8	NaN	NaN	2	7	9	2
250	22	1	370	37	0	2	1	1	0	0	0	NaN	NaN	NaN	NaN	NaN	NaN	3	158	73	110	60	55.7	41	136	103.4	103.2	88	94.4	24	2	NaN	2	NaN	2009	2	6	1	1	NaN	0	NaN	3	NaN	NaN	1	8	9	2
251	20	1	370	37	0	2	1	1	0	0	0	NaN	NaN	NaN	NaN	NaN	NaN	3	162.5	55	100	70	55	41	131	89.5	96.7	80	89.9	24	2	NaN	2	NaN	2009	1	8	1	1	NaN	0	NaN	3.5	NaN	NaN	1	8	9	2
252	25	1	370	37	0	1	1	1	0	0	0	NaN	NaN	NaN	NaN	NaN	NaN	3	148	60	110	70	53.5	34	122	95.3	89	97	84	20.5	2	NaN	2	NaN	2009	1	7	1	1	NaN	0	NaN	2.8	48	35	1	8	9	2
253	27	1	384	38	4	2	1	1	0	0	0	NaN	NaN	NaN	NaN	NaN	NaN	3	154.5	62	120	70	55.5	39	125	94.9	95.5	98	86	23.7	2	NaN	2	NaN	2009	1	3	1	1	NaN	0	NaN	2.8	NaN	NaN	1	8	9	2
254	19	1	391	39	1	2	1	1	0	0	0	NaN	NaN	NaN	NaN	NaN	NaN	3	159	74	110	70	57.3	40.5	137	103.5	104.5	103.4	92.5	24.9	2	NaN	2	NaN	2009	1	12	1	1	NaN	0	NaN	3.4	NaN	NaN	2	8	9	2
255	20	1	391	39	1	1	1	1	0	0	0	NaN	NaN	NaN	NaN	NaN	NaN	3	164	61	120	80	54.4	39	136	106.5	97	92.5	90.5	23.7	2	NaN	2	NaN	2009	1	11	1	1	NaN	0	NaN	3.1	NaN	NaN	2	8	9	2
256	19	1	381	38	1	1	1	1	0	0	0	NaN	NaN	NaN	NaN	NaN	NaN	3	174.5	66	110	80	54	41	140	94	103.5	97	98.9	25	2	NaN	2	NaN	2009	1	16	1	1	NaN	0	NaN	3.1	NaN	NaN	2	8	9	2
257	22	1	372	37	2	2	1	1	0	0	0	NaN	NaN	NaN	NaN	NaN	NaN	3	161	64	110	70	56.8	39	134	98.7	99.3	99	94.3	25	2	NaN	2	NaN	2009	1	20	1	1	NaN	0	NaN	3.9	50.5	35.5	1	8	9	2
258	18	1	395	39	5	2	1	1	0	0	0	NaN	NaN	NaN	NaN	NaN	NaN	3	153.5	64	100	70	57.5	37	125.7	98	95.7	95.5	84.3	22.5	2	NaN	2	NaN	2009	1	17	1	1	NaN	0	NaN	3.1	57.5	37.5	1	8	9	2
259	30	1	410	41	0	2	1	1	0	0	0	NaN	NaN	NaN	NaN	NaN	NaN	3	155	80	120	80	55.5	41	127.7	107.3	92	114	88	25	2	NaN	2	NaN	2009	1	21	1	1	NaN	0	NaN	3	51	36.8	2	7	9	2
260	27	1	381	38	1	1	1	1	0	0	0	NaN	NaN	NaN	NaN	NaN	NaN	3	157	60	100	70	56.8	36	130	91	94.5	91.5	92.5	22.6	1	9	2	NaN	2009	1	19	1	1	NaN	0	NaN	2.8	NaN	NaN	1	NaN	NaN	1
261	23	1	393	39	3	2	1	1	0	0	0	NaN	NaN	NaN	NaN	NaN	NaN	3	153.5	60	110	80	54	37	130	107	96	102	87.5	23.1	2	NaN	2	NaN	2009	1	11	1	1	NaN	0	NaN	3.7	NaN	NaN	1	7	8	2
262	31	1	385	38	5	2	1	1	0	0	0	NaN	NaN	NaN	NaN	NaN	NaN	3	159.7	75	120	80	56.7	39	131	136	98	106	91	24.7	2	NaN	2	NaN	2009	1	11	1	1	NaN	0	NaN	3	NaN	NaN	2	8	9	2
263	25	1	371	37	1	2	1	1	0	0	0	NaN	NaN	NaN	NaN	NaN	NaN	3	152	50	110	70	52	35	126.7	89	91	87.3	85.5	22.3	2	NaN	2	NaN	2009	1	29	1	1	NaN	0	NaN	2.1	NaN	NaN	2	NaN	NaN	2
264	28	1	384	38	4	2	1	1	0	0	0	NaN	NaN	NaN	NaN	NaN	NaN	3	162	63	100	60	58.3	40	130	97.5	96.7	92.5	93.5	25.5	2	NaN	2	NaN	2009	1	30	1	1	NaN	0	NaN	3.4	NaN	NaN	1	7	8	2
265	30	1	370	37	0	1	1	1	1	0	1	2	NaN	NaN	NaN	1	24	1	152.5	91	100	70	57	37.5	127.8	110.3	94.3	117	87.4	23.9	2	NaN	2	NaN	2009	2	30	2	3	6	0	NaN	3.1	NaN	NaN	2	8	9	2
266	35	2	381	38	1	1	1	1	0	0	0	NaN	NaN	NaN	NaN	NaN	NaN	3	158	65	70	60	56	39	131	100.5	98	98	89	24	2	NaN	2	NaN	2009	2	8	2	1	8	0	NaN	2.6	NaN	NaN	1	8	9	2
267	24	1	383	38	3	2	1	1	0	0	0	NaN	NaN	NaN	NaN	NaN	NaN	3	156	60	90	60	55	37.5	126	95.5	96	92.5	90	24	2	NaN	2	NaN	2009	2	13	1	1	NaN	0	NaN	2.7	NaN	NaN	1	8	9	2
268	25	1	390	39	0	1	1	1	0	0	0	NaN	NaN	NaN	NaN	NaN	NaN	3	160	58	140	80	59	41	130	105	99	90.5	92	23.9	2	NaN	2	NaN	2009	7	4	1	1	NaN	0	NaN	3.2	NaN	NaN	2	8	9	2
269	18	1	390	39	0	1	1	1	0	0	0	NaN	NaN	NaN	NaN	NaN	NaN	3	168	73	100	90	57.5	40	130	104	104	105	98	24.2	2	NaN	2	NaN	2009	1	30	1	1	NaN	0	NaN	3.1	NaN	NaN	2	8	9	2
270	23	1	406	40	6	2	1	1	0	0	0	NaN	NaN	NaN	NaN	NaN	NaN	3	162	76	100	70	54.7	41	134.7	105.6	101	105	93	25	2	NaN	2	NaN	2009	1	24	1	1	NaN	0	NaN	3.7	NaN	NaN	2	8	9	2
271	24	1	405	40	5	1	1	1	0	0	0	NaN	NaN	NaN	NaN	NaN	NaN	3	161	72	100	60	54	40	139	106.5	102	105	95	23.3	2	NaN	2	NaN	2009	2	1	1	1	NaN	0	NaN	3.4	51	37	1	8	9	2
272	26	1	375	37	5	2	1	1	0	0	0	NaN	NaN	NaN	NaN	NaN	NaN	3	150	64	150	100	57	36	126	101	87.6	97	86	23	2	NaN	2	NaN	2009	1	27	2	1	8	0	NaN	2	NaN	NaN	2	8	9	2
273	23	1	381	38	1	2	1	1	0	0	0	NaN	NaN	NaN	NaN	NaN	NaN	3	158	58	100	70	58.3	36	130	90.3	94	91	90	23.4	2	NaN	2	NaN	2009	2	18	1	1	NaN	0	NaN	NaN	NaN	NaN	2	NaN	NaN	2
274	23	1	392	39	2	1	1	1	0	0	0	NaN	NaN	NaN	NaN	NaN	NaN	3	157	61	160	50	52	37.5	127	115	95	94.3	80.5	23.3	2	NaN	2	NaN	2009	2	9	1	1	NaN	0	NaN	3.5	51	36	1	8	9	2
275	26	1	420	42	0	2	1	1	0	0	0	NaN	NaN	NaN	NaN	NaN	NaN	3	150	56.6	120	80	56	35.6	121	103.8	87.5	80.3	80.2	22.8	2	NaN	2	NaN	2009	1	23	2	1	6	0	NaN	4.3	51	36	2	8	9	2
276	26	1	381	38	1	2	1	1	0	0	0	NaN	NaN	NaN	NaN	NaN	NaN	3	165.5	65	120	60	57	42	137	99	100	94.5	95.5	24.8	2	NaN	2	NaN	2009	2	26	1	1	NaN	0	NaN	3.1	NaN	NaN	2	8	9	2
277	23	1	406	40	6	1	1	1	0	0	0	NaN	NaN	NaN	NaN	NaN	NaN	3	150	48	100	60	55.7	35	123	85.5	92	88.8	84.7	22.9	2	NaN	2	NaN	2009	2	1	1	1	NaN	0	NaN	2.6	NaN	NaN	1	8	9	2
278	22	1	370	37	0	2	1	1	0	0	0	NaN	NaN	NaN	NaN	NaN	NaN	3	155	66	120	60	53.7	39	135	94.5	97	98	95.7	21	2	NaN	2	NaN	2009	2	20	1	1	NaN	0	NaN	3.2	NaN	NaN	1	8	9	2
279	28	1	390	39	0	1	1	1	0	0	0	NaN	NaN	NaN	NaN	NaN	NaN	3	163.7	70	130	80	54.5	37	136.7	101	101	101.7	94	23.8	2	NaN	2	NaN	2009	2	10	1	1	NaN	0	NaN	3.4	NaN	NaN	2	8	9	2
280	27	1	380	38	0	1	1	1	0	0	0	NaN	NaN	NaN	NaN	NaN	NaN	3	165.5	70	100	70	55	41	140	96.5	105.7	100.7	96	26.3	2	NaN	2	NaN	2009	2	21	1	1	NaN	0	NaN	2.2	NaN	NaN	1	8	9	2
281	29	1	384	38	4	1	1	1	1	1	1	1	NaN	NaN	NaN	NaN	21	2	166.7	73	110	70	58.3	39	138.2	103	104	103	97	25	2	NaN	2	NaN	2009	2	15	1	1	NaN	0	NaN	3.5	NaN	NaN	2	8	9	2
282	29	1	400	40	0	2	1	1	0	0	0	NaN	NaN	NaN	NaN	NaN	NaN	3	158	74	90	60	56.7	39	139	109	97.8	101.7	89.5	23	2	NaN	2	NaN	2009	2	8	1	1	NaN	0	NaN	3.3	NaN	NaN	2	8	9	2
283	27	1	372	37	2	2	1	1	0	0	0	NaN	NaN	NaN	NaN	NaN	NaN	3	167.3	78	110	70	57.2	39.5	138.5	109.7	105.5	104.5	96.8	26	2	NaN	2	NaN	2009	2	25	1	1	NaN	0	NaN	3.2	NaN	NaN	1	8	9	2
284	25	1	370	37	0	1	1	1	0	0	0	NaN	NaN	NaN	NaN	NaN	NaN	3	153	60	120	80	54	39	126.3	86.5	94	88.4	86.7	23.4	2	NaN	2	NaN	2009	3	3	1	1	NaN	0	NaN	3.3	NaN	NaN	1	8	9	2
285	24	1	395	39	5	2	1	1	0	0	0	NaN	NaN	NaN	NaN	NaN	NaN	3	163	69	110	80	58.4	38	136.3	98	103	96	97.5	24	2	NaN	2	NaN	2009	2	16	1	1	NaN	0	NaN	3.2	NaN	NaN	1	9	10	2
286	26	1	395	39	5	1	1	1	0	0	0	NaN	NaN	NaN	NaN	NaN	NaN	3	160	68	110	70	55	39	136.5	102	100.3	101.7	94	24.6	2	NaN	2	NaN	2009	2	17	1	1	NaN	0	NaN	3.2	NaN	NaN	1	8	9	2
287	32	1	393	39	3	1	1	1	0	0	0	NaN	NaN	NaN	NaN	NaN	NaN	3	171	89	100	60	61	49	138	111	104.5	110	93	26.3	2	NaN	2	NaN	2009	2	21	1	1	NaN	0	NaN	3.3	NaN	NaN	2	8	9	2
288	25	1	370	37	0	2	1	1	1	0	1	2	NaN	NaN	NaN	1	72	1	144	50	110	70	53	29	121	97	86.4	90.3	83	21.8	2	NaN	2	NaN	2009	2	16	2	3	6	0	NaN	2.9	NaN	NaN	2	8	9	2
289	26	1	375	37	5	1	1	1	0	0	0	NaN	NaN	NaN	NaN	NaN	NaN	3	166.5	71	110	70	57	42	141.8	101	105	98	95	27	2	NaN	2	NaN	2009	2	12	1	1	NaN	0	NaN	3.1	NaN	NaN	2	8	9	2
290	20	1	371	37	1	1	1	1	0	0	0	NaN	NaN	NaN	NaN	NaN	NaN	3	155.3	77	100	80	53	36	102	109	100	108.4	94.4	24.7	2	NaN	2	NaN	2009	3	9	1	1	NaN	0	NaN	3.3	NaN	NaN	1	8	9	2
291	32	1	374	37	4	1	1	1	0	0	0	NaN	NaN	NaN	NaN	NaN	NaN	3	168.5	83	120	80	54.5	40	130	102	100.5	104	87.4	25.8	2	NaN	2	NaN	2009	2	21	1	1	NaN	0	NaN	3.2	NaN	NaN	2	8	9	2
292	25	1	374	37	4	1	1	1	1	0	1	1	NaN	NaN	NaN	NaN	NaN	2	159	62.5	110	70	57.8	39	128	101	93	89.7	91	24.5	2	NaN	2	NaN	2009	3	9	1	1	NaN	0	NaN	3.6	NaN	NaN	1	8	9	2
293	20	1	380	38	0	1	1	1	0	0	0	NaN	NaN	NaN	NaN	NaN	NaN	3	158.8	57	120	80	54	37	130	92.4	95	91.2	88.4	23.5	2	NaN	2	NaN	2009	3	6	1	1	NaN	0	NaN	3.5	NaN	NaN	1	8	9	2
294	24	1	402	40	2	2	1	1	0	0	0	NaN	NaN	NaN	NaN	NaN	NaN	3	155	57	90	60	52.3	37.8	126.7	94.5	99.2	85.5	90	24.4	2	NaN	2	NaN	2009	2	27	2	1	5	0	NaN	3.6	NaN	NaN	1	8	9	2
295	30	2	381	38	1	1	1	1	2	0	2	2	2	NaN	NaN	1	12	1	157	87.5	110	70	56.5	38.2	133.5	102.4	98	113	88	23.9	2	NaN	2	NaN	2009	2	28	2	3	6	0	NaN	4.2	NaN	NaN	2	8	9	2
296	21	1	384	38	4	2	1	1	0	0	0	NaN	NaN	NaN	NaN	NaN	NaN	3	157.8	71	100	70	58.2	38	126.6	101.5	95	96.7	83.5	24.3	2	NaN	2	NaN	2009	3	9	1	1	NaN	0	NaN	3.2	NaN	NaN	1	8	9	2
297	25	1	386	38	6	1	1	1	0	0	0	NaN	NaN	NaN	NaN	NaN	NaN	3	152	60	80	60	54	43	127.2	105.6	101	95.6	93	23	2	NaN	2	NaN	2009	2	30	1	1	NaN	0	NaN	3.4	NaN	NaN	2	8	9	2
298	28	1	373	37	3	2	1	1	1	0	1	2	NaN	NaN	NaN	1	14	1	159.5	63	100	70	51	37	133.5	97.8	98.7	95	94.5	25.3	2	NaN	2	NaN	2009	3	13	2	1	6	0	NaN	3.6	NaN	NaN	2	8	9	2
299	24	1	370	37	0	2	1	1	1	0	1	2	NaN	NaN	NaN	1	72	1	154.7	73.5	100	70	56	40	124.5	102.3	91.5	104.5	84	23.2	2	NaN	2	NaN	2009	4	6	2	3	6	0	NaN	4	NaN	NaN	1	NaN	NaN	2
300	28	1	404	40	4	1	1	1	1	2	1	2	NaN	NaN	NaN	1	72	1	151.5	50	100	70	53	34	128	92.5	95	88.5	89.3	22	2	NaN	2	NaN	2009	2	26	2	3	6	0	NaN	2.9	NaN	NaN	2	8	9	2
301	33	1	370	37	0	2	1	1	3	0	3	2	2	NaN	NaN	1	48	1	150	69	110	70	54	35	128	104.7	97.5	96.7	87.5	22.3	2	NaN	2	NaN	2009	3	18	2	3	6	0	NaN	3.3	NaN	NaN	1	4	6	2
302	34	1	386	38	6	1	1	1	1	0	1	2	NaN	NaN	NaN	1	11	1	146.7	63.5	100	70	54	37	127.8	100.5	95	98	85	23	2	NaN	2	NaN	2009	3	13	2	3	6	0	NaN	3	NaN	NaN	2	8	9	2
303	27	1	370	37	0	1	1	1	1	0	1	2	NaN	NaN	NaN	1	24	1	150	61	140	100	54.5	39	122.7	97.6	93.5	97.2	90	22.5	2	NaN	2	NaN	2009	3	26	2	3	6	0	NaN	2.6	NaN	NaN	1	8	9	2
304	26	1	390	39	0	1	1	1	1	0	1	2	NaN	NaN	NaN	1	24	1	160	63	90	60	57	36	163	101	96	90	87	22.5	2	NaN	2	NaN	2009	3	27	2	3	6	0	NaN	3.7	NaN	NaN	1	8	9	2
[truncated: 123 more columns]
